# Supplementary material for: pH-dependent two novel 3D polynuclear cobalt(ii) cluster-based metal–organic frameworks constructed from a tri-pyridyl-bis-amide and a polycarboxylate: assembly, structures and properties
Source: Royal Society of Chemistry journal article supplement (doi:10.1039/c3ra41552j), 2013-01-01
Supplement: c3ra41552j.pdf [file c3ra41552j.pdf]

Supplementary Material (ESI) for RSC Advances  
This journal is © The Royal Society of Chemistry

**pH-Dependent two novel 3D polynuclear cobalt(II) cluster-based metal-organic frameworks constructed from a tri-pyridyl-bis-amide and a polycarboxylate: assembly, structures and properties †**

**Xiuli Wang\*, Jingjing Huang, Lianli Liu, Guocheng Liu, Hongyan Lin, Juwen Zhang, Naili Chen and Yun Qu**

*Department of Chemistry, Bohai University, Liaoning Province Silicon Materials Engineering  
Technology Research Centre, Jinzhou, 121000, P. R. China*

**ELECTRONIC SUPPLEMENTARY INFORMATION**

**Table S1** Selected bond distances (Å) and angles (deg) for complexes **1–2**.

| <b>1</b>             |            |                      |            |
|----------------------|------------|----------------------|------------|
| Co(1)-O(1)#1         | 2.015(3)   | Co(1)-O(2)#2         | 2.030(3)   |
| Co(1)-O(5)#3         | 2.122(3)   | Co(1)-O(6)#3         | 2.248(3)   |
| Co(1)-N(5)           | 2.146(4)   | Co(1)-N(3)#4         | 2.181(3)   |
| Co(2)-O(3)           | 2.058(3)   | Co(2)-O(1W)          | 2.124(3)   |
| Co(2)-O(3)#6         | 2.058(3)   | Co(2)-O(1W)#6        | 2.124(3)   |
| Co(2)-N(1)           | 2.178(4)   | Co(2)-N(1)#6         | 2.178(4)   |
| O(1)#1-Co(1)-O(2)#2  | 118.83(11) | O(1)#1-Co(1)-O(5)#3  | 91.59(11)  |
| O(2)#2-Co(1)-O(5)#3  | 149.14(11) | O(1)#1-Co(1)-N(5)    | 90.87(13)  |
| O(2)#2-Co(1)-N(5)    | 94.48(12)  | O(5)#3-Co(1)-N(5)    | 89.79(12)  |
| O(1)#1-Co(1)-N(3)#4  | 83.96(13)  | O(2)#2-Co(1)-N(3)#4  | 88.65(12)  |
| O(5)#3-Co(1)-N(3)#4  | 89.66(12)  | N(5)-Co(1)-N(3)#4    | 174.78(13) |
| O(1)#1-Co(1)-O(6)#3  | 150.52(11) | O(2)#2-Co(1)-O(6)#3  | 89.52(10)  |
| O(5)#3-Co(1)-O(6)#3  | 59.64(10)  | N(5)-Co(1)-O(6)#3    | 94.99(13)  |
| N(3)#4-Co(1)-O(6)#3  | 89.20(12)  | O(3)#6-Co(2)-O(3)    | 180        |
| O(3)#6-Co(2)-O(1W)#6 | 90.01(12)  | O(3)-Co(2)-O(1W)#6   | 89.99(12)  |
| O(3)#6-Co(2)-O(1W)   | 89.99(12)  | O(3)-Co(2)-O(1W)     | 90.01(12)  |
| O(1W)#6-Co(2)-O(1W)  | 180        | O(3)#6-Co(2)-N(1)    | 87.86(13)  |
| O(3)-Co(2)-N(1)      | 92.14(13)  | O(1W)#6-Co(2)-N(1)   | 90.64(14)  |
| O(1W)-Co(2)-N(1)     | 89.36(14)  | O(3)#6-Co(2)-N(1)#6  | 92.14(13)  |
| O(3)-Co(2)-N(1)#6    | 87.86(13)  | O(1W)#6-Co(2)-N(1)#6 | 89.36(14)  |
| O(1W)-Co(2)-N(1)#6   | 90.64(14)  | N(1)-Co(2)-N(1)#6    | 180        |

Symmetry transformations used to generate equivalent atoms: #1  $x - 1, y, z$ ; #2  $-x - 1, -y, -z + 3$ ;  
#3  $-x, -y, -z + 3$ ; #4  $x, y - 1, z$ ; #6  $-x, -y + 1, -z + 2$

**Supplementary Material (ESI) for RSC Advances**  
**This journal is © The Royal Society of Chemistry**

---

2

---

|                     |            |                     |            |
|---------------------|------------|---------------------|------------|
| Co(1)-O(1)          | 2.0983(18) | Co(1)-O(9)#3        | 2.0875(18) |
| Co(1)-O(6)#2        | 2.0800(19) | Co(1)-O(2)#1        | 2.1130(19) |
| Co(1)-O(9)          | 2.1420(19) | Co(1)-N(1)          | 2.156(2)   |
| Co(2)-O(1)          | 2.286(2)   | Co(2)-O(9)          | 1.9628(18) |
| Co(2)-O(3)#1        | 1.9616(19) | Co(2)-O(5)#4        | 1.9712(19) |
| Co(2)-N(3)#5        | 2.121(2)   |                     |            |
| O(6)#2-Co(1)-O(9)#3 | 98.80(7)   | O(6)#2-Co(1)-O(1)   | 171.43(7)  |
| O(9)#3-Co(1)-O(1)   | 88.09(7)   | O(6)#2-Co(1)-O(2)#1 | 85.46(7)   |
| O(9)#3-Co(1)-O(2)#1 | 171.01(7)  | O(1)-Co(1)-O(2)#1   | 87.03(7)   |
| O(6)#2-Co(1)-O(9)   | 94.36(8)   | O(9)#3-Co(1)-O(9)   | 79.68(7)   |
| O(1)-Co(1)-O(9)     | 81.81(7)   | O(2)#1-Co(1)-O(9)   | 92.15(7)   |
| O(6)#2-Co(1)-N(1)   | 87.71(9)   | O(9)#3-Co(1)-N(1)   | 97.32(8)   |
| O(1)-Co(1)-N(1)     | 96.50(8)   | O(2)#1-Co(1)-N(1)   | 90.74(9)   |
| O(9)-Co(1)-N(1)     | 176.57(8)  | O(3)#1-Co(2)-O(9)   | 106.91(8)  |
| O(3)#1-Co(2)-O(5)#4 | 137.40(9)  | O(9)-Co(2)-O(5)#4   | 113.18(8)  |
| O(3)#1-Co(2)-N(3)#5 | 93.76(9)   | O(9)-Co(2)-N(3)#5   | 100.16(9)  |
| O(5)#4-Co(2)-N(3)#5 | 92.91(9)   | O(3)#1-Co(2)-O(1)   | 84.48(8)   |
| O(9)-Co(2)-O(1)     | 81.25(7)   | O(5)#4-Co(2)-O(1)   | 87.79(7)   |
| N(3)#5-Co(2)-O(1)   | 178.02(8)  |                     |            |

Symmetry transformations used to generate equivalent atoms: #1  $-x + 1, -y + 1, -z$ ; #2  $x - 1, y + 1, z$ ; #3  $-x + 1, -y + 2, -z$ ; #4  $-x + 2, -y + 1, -z$ ; #5  $x, y, z - 1$

---

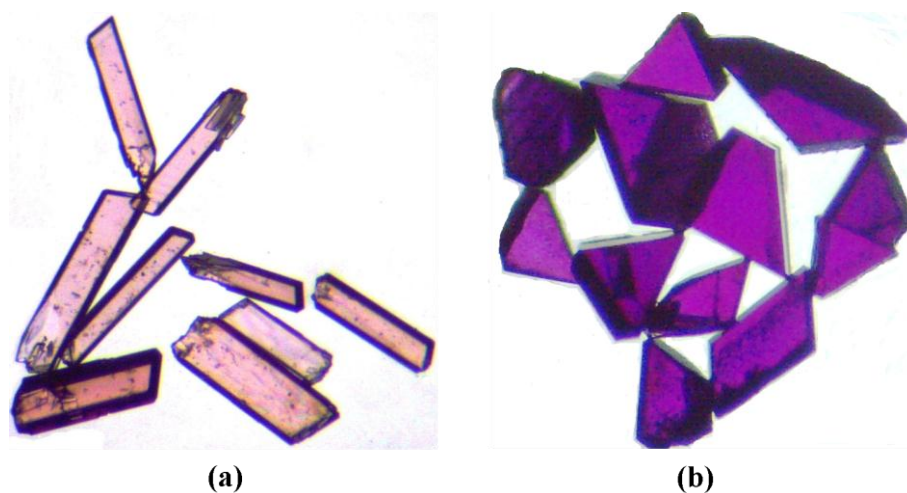

**Fig. S1** (a) The photo of complex **1**. (b) The photo of complex **2**.

Supplementary Material (ESI) for RSC Advances  
This journal is © The Royal Society of Chemistry

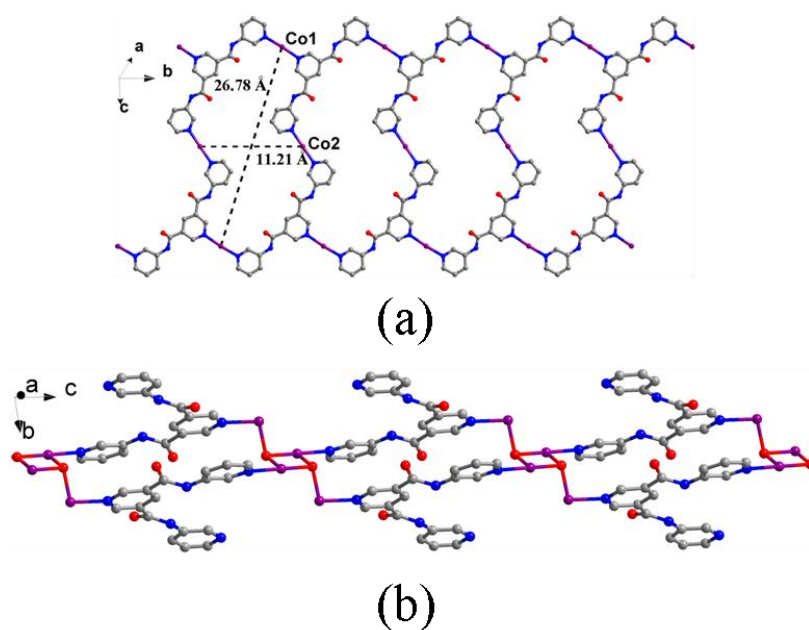

**Fig. S2** (a) The  $\text{Co}_4(\text{L})_4$  50-membered ring in the 1D ladder structure for complex 1. (b) The 1D chain for complex 2.

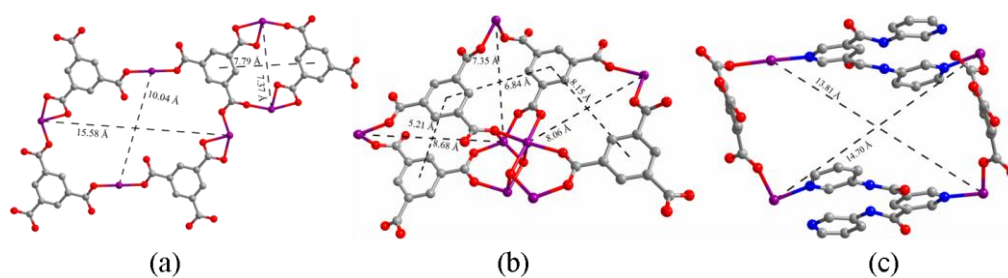

**Fig. S3** (a) Two kinds of loops  $\text{Co}_2(\text{BTC})_2$  and  $\text{Co}_4(\text{BTC})_4$  in the 2D layer for complex 1. (b) Three types of 16-membered rings of  $\text{Co}_2(\text{BTC})_2$  in the 2D layer in complex 2. (c) The macro ring composed by L ligands and BTC anions in complex 2.

Supplementary Material (ESI) for RSC Advances  
This journal is © The Royal Society of Chemistry

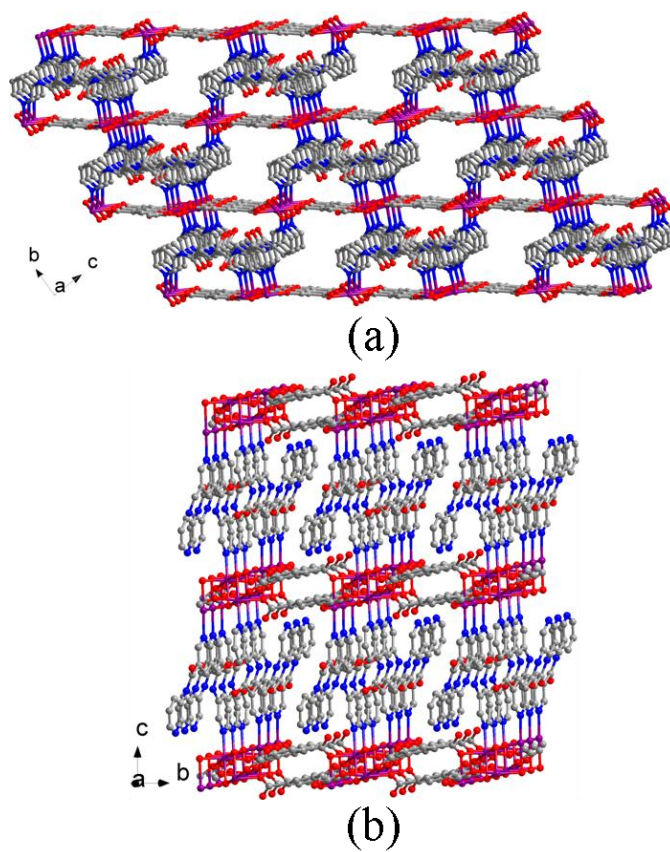

Fig. S4 (a) 3D packing structure of complex 1. (b) 3D packing structure of complex 2.

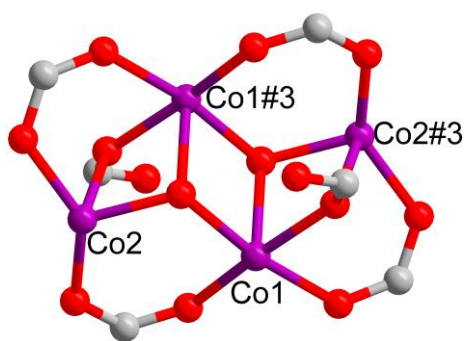

Fig. S5 Perspective view of tetranuclear cobalt cluster in complex 2. Symmetry codes: #3  $-x + 1,$   
 $-y + 2, -z.$

Supplementary Material (ESI) for RSC Advances  
This journal is © The Royal Society of Chemistry

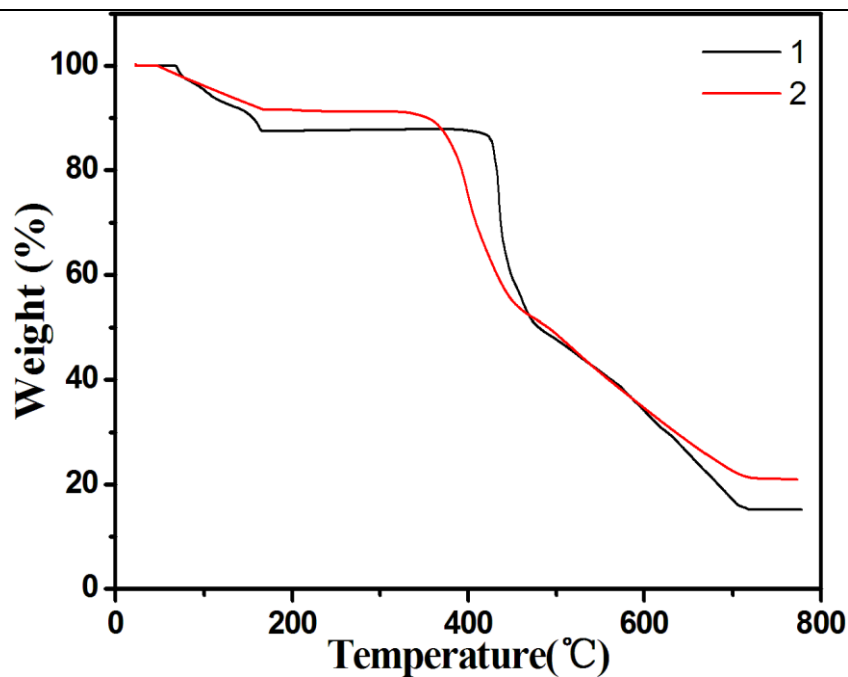

Fig.S6 The TG curves of complexes 1–2.

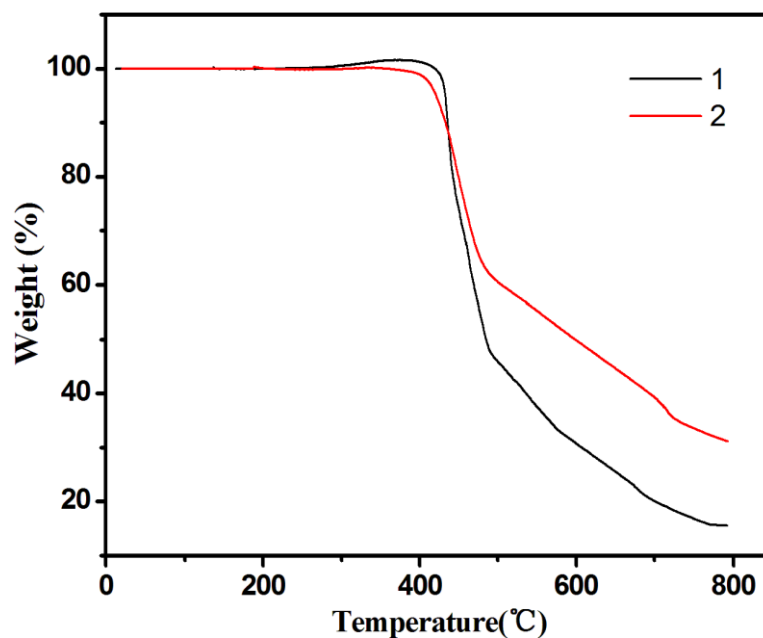

Fig. S7 The TG curves of complexes 1–2 after heated at 170 °C.

#### Preparation of the 1-CPE and 2-CPE

Complexes **1** and **2** bulk-modified carbon paste electrodes (**1**-CPE and **2**-CPE) were fabricated as follows: 0.55 g graphite powder and 0.035 g complex **1** or **2** were mixed and ground together by agate mortar and pestle for about 45 min, and then 0.2 mL paraffin oil was added with stirring.

**Supplementary Material (ESI) for RSC Advances**  
**This journal is © The Royal Society of Chemistry**

The homogenized mixture was packed into a glass tube (3 mm inner diameter) to a length of 8 mm. The electrical contact was established with the copper rod, and the surface of the 1-CPE or 2-CPE was polished by weighing paper. The same procedure was used for preparation of the bare CPE without title complex.

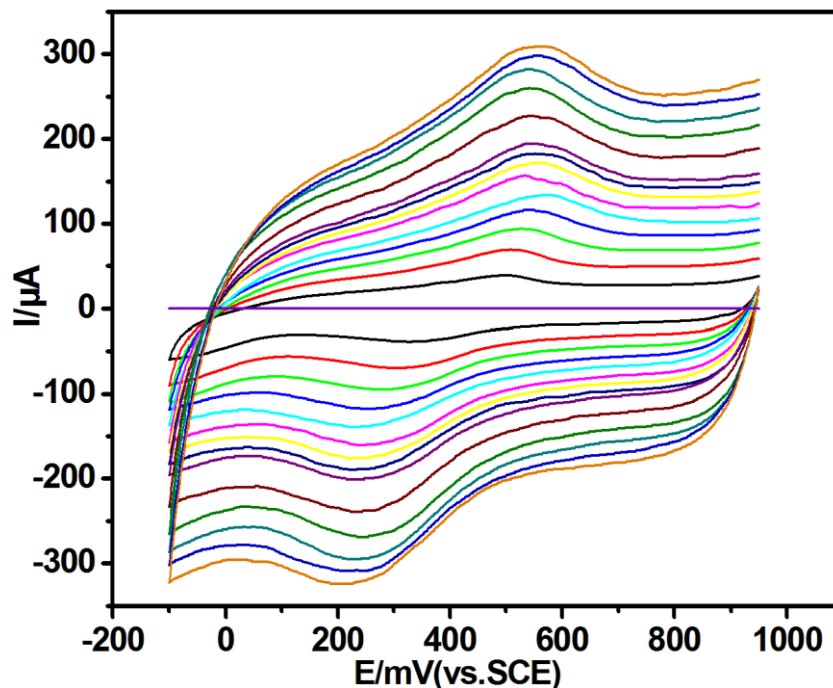

**Fig. S8** Cyclic voltammograms of the 1-CPE in 0.5 M Na<sub>2</sub>SO<sub>4</sub> aqueous solution (pH = 3 adjusted by H<sub>2</sub>SO<sub>4</sub>) at different scan rates (from inner to outer: the bare CPE, 20, 40, 60, 80, 100, 120, 140, 180, 200, 250, 300, 350, 400, 450 mV·s<sup>-1</sup>).

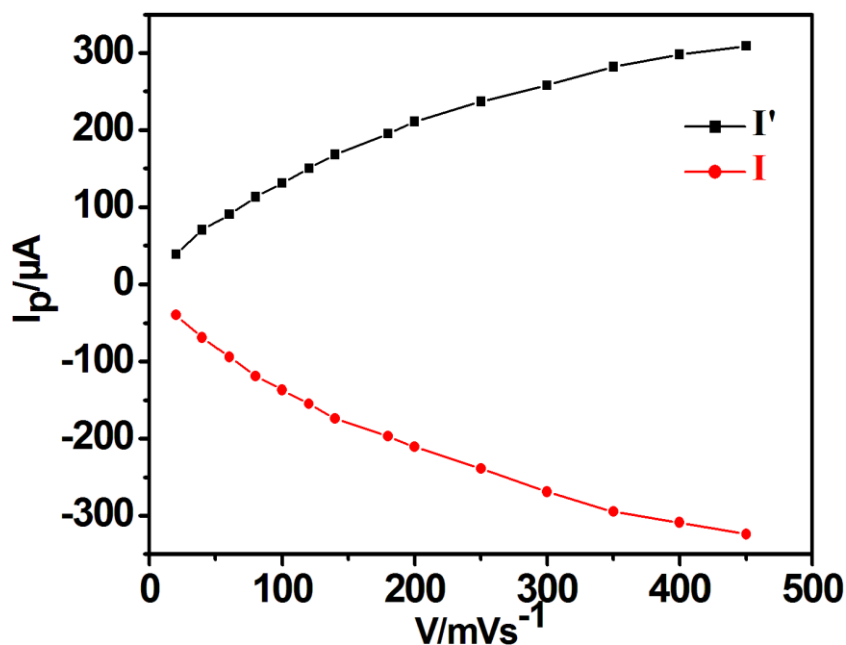

**Fig. S9** The plots of the anodic and cathodic peak currents against scan rates for the 1-CPE.

**Supplementary Material (ESI) for RSC Advances**  
**This journal is © The Royal Society of Chemistry**

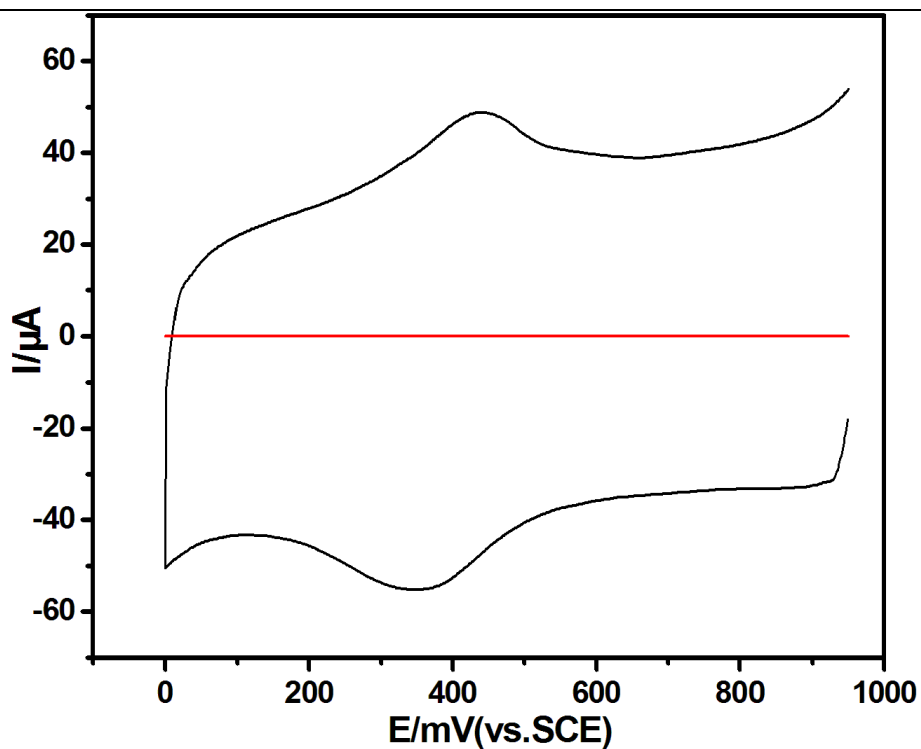

**Fig. S10** Cyclic voltammograms of the bare CPE and 2-CPE in 0.5 M  $\text{Na}_2\text{SO}_4$  aqueous solution (pH = 3 adjusted by  $\text{H}_2\text{SO}_4$ ) in the potential range of 950 – 0 mV. Scan rate:  $80 \text{ mVs}^{-1}$ .
